# Supplementary material for: Alcohol Use and Antiobesity Medication Treatment
Source: PubMed Central journal article supplement — JAMA Netw Open. 2024 Nov 26;7(11):e2447644. doi: 10.1001/jamanetworkopen.2024.47644 (PMC11600229; doi:10.1001/jamanetworkopen.2024.47644), 2024-11-26
Supplement: jamanetwopen-e2447644-s002.pdf [file jamanetwopen-e2447644-s002.pdf]

## Data Sharing Statement

Miller-Matero. Alcohol Use and Antiobesity Medication Treatment. *JAMA Netw Open*.  
Published November 26, 2024. doi:10.1001/jamanetworkopen.2024.47644

### Data

**Data available:** Yes

**Data types:** Deidentified participant data

**How to access data:** The datasets generated during and/or analyzed during the current study are available from the corresponding author upon reasonable request ([LMatero1@hfhs.org](mailto:LMatero1@hfhs.org))

**When available:** With publication

### Supporting Documents

**Document types:** None

### Additional Information

**Who can access the data:** Researchers whose proposed use of the data has been approved

**Types of analyses:** For specified purpose

**Mechanisms of data availability:** After approval of a proposal and with a signed data use agreement
